# Supplementary material
Source: PubMed Central journal article supplement (PMC3579582)
Supplement: NIHMS426927-supplement-01.pdf [file NIHMS426927-supplement-01.pdf]

## SUPPLEMENTAL MATERIAL

Supplemental Figure 1: Flow diagram representing subjects eligible for this analysis from NHLBI Dynamic Registry Waves 4-5 recruitment cohorts\*

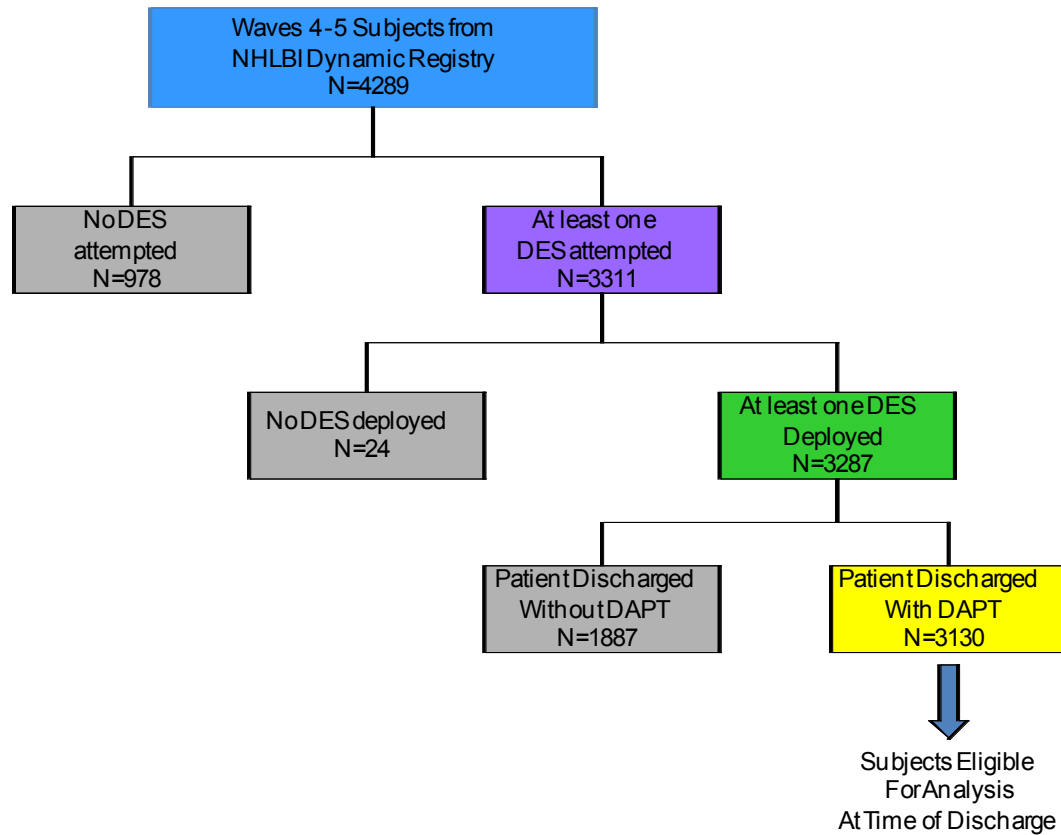

NHLBI, National Heart, Lung, Blood Institute; DAPT, Dual antiplatelet therapy defined as therapy with aspirin and clopidogrel; DES, Drug-eluting stent

Supplemental Figure 2: Propensity Adjusted Relative risk for Death and Death/MI with Dual Anti-platelet Therapy at 12- and 24-Month Landmark Time Points

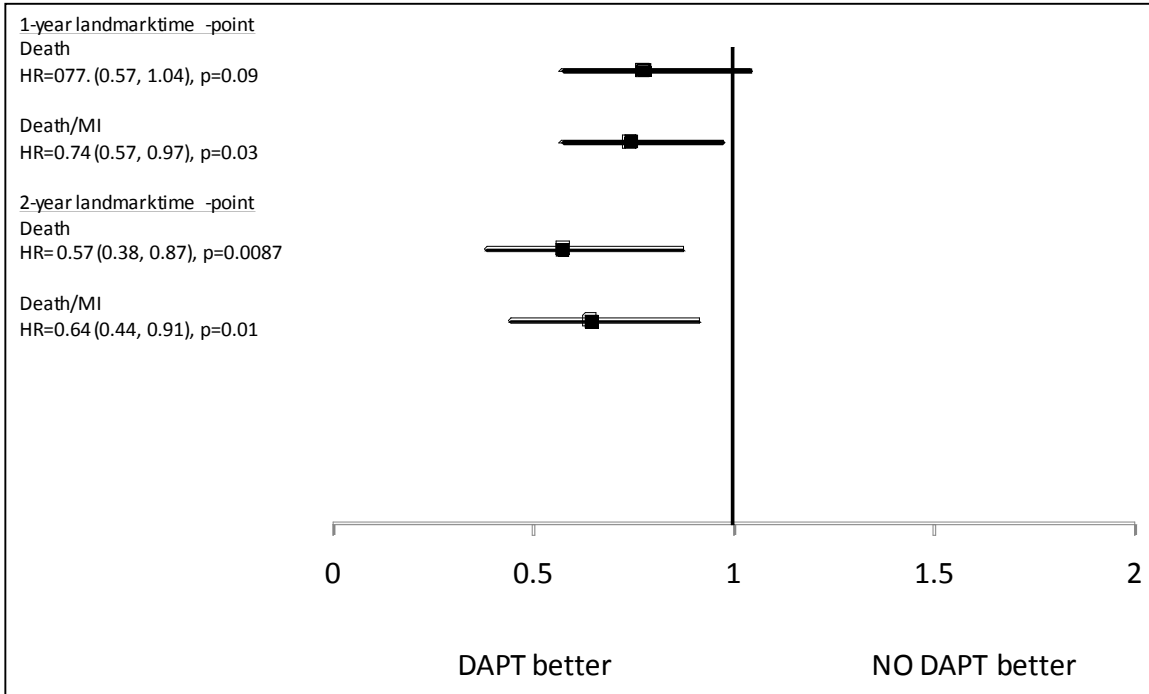

HR, hazard ratio; MI, myocardial infarction; DAPT, dual anti-platelet therapy

Supplemental Table Ia: Reason for Discontinuation of Antiplatelet Medications in Wave  
 5 Subjects who were Not on Dual Antiplatelet Therapy at 12 Month-Landmark Time  
 Point.

| 12-Month Landmark Analysis                 | Aspirin & No<br>Clopidogrel<br>(N=200) | Clopidogrel &<br>No Aspirin<br>(N=32) | Neither Aspirin nor<br>Clopidogrel (N=27) |                   |
|--------------------------------------------|----------------------------------------|---------------------------------------|-------------------------------------------|-------------------|
|                                            |                                        |                                       | No<br>Aspirin                             | No<br>Clopidogrel |
| Physician discontinued<br>Medication(s), % | 90.0                                   | 68.8                                  | 66.6                                      | 77.8              |
| Patient Non-compliance, %                  | 4.5                                    | 25.0                                  | 29.6                                      | 22.2              |
| Unknown, %                                 | 5.5                                    | 6.3                                   | 3.7                                       | 0.0               |

Supplemental Table Ib: Reason for Discontinuation of Antiplatelet Medications in Wave  
 5 Subjects who were Not on Dual Antiplatelet Therapy at 24 Month-Landmark Time  
 Point.

| 24-Month Landmark                          | Aspirin & No<br>Clopidogrel<br>(N=336) | Clopidogrel &<br>No Aspirin<br>(N=44) | Neither Aspirin nor<br>Clopidogrel (N=36) |                   |
|--------------------------------------------|----------------------------------------|---------------------------------------|-------------------------------------------|-------------------|
|                                            |                                        |                                       | No<br>Aspirin                             | No<br>Clopidogrel |
| Physician discontinued<br>Medication(s), % | 90.8                                   | 65.9                                  | 77.8                                      | 80.6              |
| Patient Non-compliance, %                  | 3.3                                    | 20.5                                  | 16.7                                      | 11.1              |
| Unknown, %                                 | 6.0                                    | 13.6                                  | 5.6                                       | 8.3               |

Supplemental Table II: Subgroup Analysis of the Adjusted Relative Risk for Death and Myocardial Infarction for Dual Antiplatelet Therapy versus No Dual Antiplatelet at 12-Month and 24-Month Landmarks.

| Death/MI AHR Rates for DAPT (vs No DAPT) | One Year Landmark |      |            |         | Two Year Landmark |      |            |         |
|------------------------------------------|-------------------|------|------------|---------|-------------------|------|------------|---------|
|                                          | N                 | AHR  | 95% CI     | P value | N                 | AHR  | 95% CI     | P Value |
| No Diabetes                              | 1532              | 0.74 | 0.53, 1.03 | 0.07    | 1374              | 0.64 | 0.39, 1.05 | 0.08    |
| Diabetes                                 | 624               | 0.82 | 0.52, 1.29 | 0.39    | 544               | 0.87 | 0.50, 1.51 | 0.63    |
| GFR<60                                   | 549               | 0.62 | 0.43, 0.92 | 0.02    | 470               | 0.63 | 0.38, 1.05 | 0.08    |
| GFR>=60                                  | 1538              | 0.77 | 0.53, 1.13 | 0.18    | 1386              | 0.55 | 0.32, 0.94 | 0.03    |
| Age<60                                   | 838               | 0.92 | 0.52, 1.61 | 0.76    | 749               | 0.87 | 0.43, 1.77 | 0.70    |
| Age 60-75                                | 905               | 0.69 | 0.45, 1.04 | 0.08    | 809               | 0.64 | 0.37, 1.09 | 0.10    |
| Age >75                                  | 413               | 0.68 | 0.43, 1.07 | 0.09    | 360               | 0.56 | 0.29, 1.09 | 0.09    |
| Prior MI                                 | 497               | 1.13 | 0.66, 1.93 | 0.65    | 431               | 1.11 | 0.54, 2.28 | 0.77    |
| No Prior MI                              | 1659              | 0.66 | 0.48, 0.90 | 0.0084  | 1487              | 0.51 | 0.33, 0.79 | 0.002   |
| Unstable Angina                          | 707               | 0.90 | 0.55, 1.47 | 0.67    | 616               | 0.47 | 0.23, 0.95 | 0.04    |
| Stable Angina                            | 463               | 0.49 | 0.26, 0.93 | 0.03    | 417               | 1.17 | 0.48, 2.89 | 0.73    |
| Acute MI                                 | 586               | 0.63 | 0.38, 1.05 | 0.08    | 522               | 0.65 | 0.33, 1.30 | 0.22    |
| One Vessel CAD                           | 806               | 1.30 | 0.76, 2.22 | 0.34    | 722               | 1.58 | 0.79, 3.15 | 0.19    |
| Two Vessel CAD                           | 708               | 0.60 | 0.37, 0.98 | 0.04    | 632               | 0.28 | 0.13, 0.59 | 0.0008  |
| Three Vessel CAD                         | 637               | 0.55 | 0.36, 0.82 | 0.0037  | 560               | 0.64 | 0.36, 1.11 | 0.11    |

|                                         |      |      |            |      |     |      |            |        |
|-----------------------------------------|------|------|------------|------|-----|------|------------|--------|
| Off label use                           | 1034 | 0.69 | 0.48, 0.99 | 0.05 | 912 | 0.42 | 0.25, 0.70 | 0.0009 |
| Pt received >1 DES                      | 838  | 0.61 | 0.40, 0.94 | 0.02 | 745 | 0.31 | 0.17, 0.58 | 0.0002 |
| Pt Received BMS and DES at Index PCI    | 109  | 0.55 | 0.19, 1.59 | 0.27 | 97  | 1.04 | 0.21, 5.21 | 0.96   |
| Pt Received DES in prox LAD             | 346  | 0.57 | 0.28, 1.16 | 0.12 | 312 | 0.57 | 0.20, 1.64 | 0.30   |
| Pt Received DES in Left Main            | 59   | 1.33 | 0.24, 7.55 | 0.75 | --- | ---  | ---        | ---    |
| Pt Received DES in a Bifurcation Lesion | 273  | 0.45 | 0.23, 0.86 | 0.02 | 240 | 0.22 | 0.08, 0.61 | 0.0035 |

---

MI, myocardial infarction; AHR, adjusted hazard ratio; C.I., confidence interval; GFR, Glomerular filtration rate; MI, myocardial infarction; DES, drug-eluting stent; BMS, bare-metal stent; PCI, percutaneous coronary intervention; Prox LAD, proximal segment of the left anterior descending artery
